# Supplementary material for: Immunohistochemical Ki67 after short-term hormone therapy identifies low-risk breast cancers as reliably as genomic markers
Source: PubMed Central journal article supplement (PMC5432244; doi:10.18632/oncotarget.15385), 2017-02-16
Supplement: oncotarget-08-26122-s001.pdf [file oncotarget-08-26122-s001.pdf]

# Immunohistochemical Ki67 after short-term hormone therapy identifies low-risk breast cancers as reliably as genomic markers

## Supplementary Materials

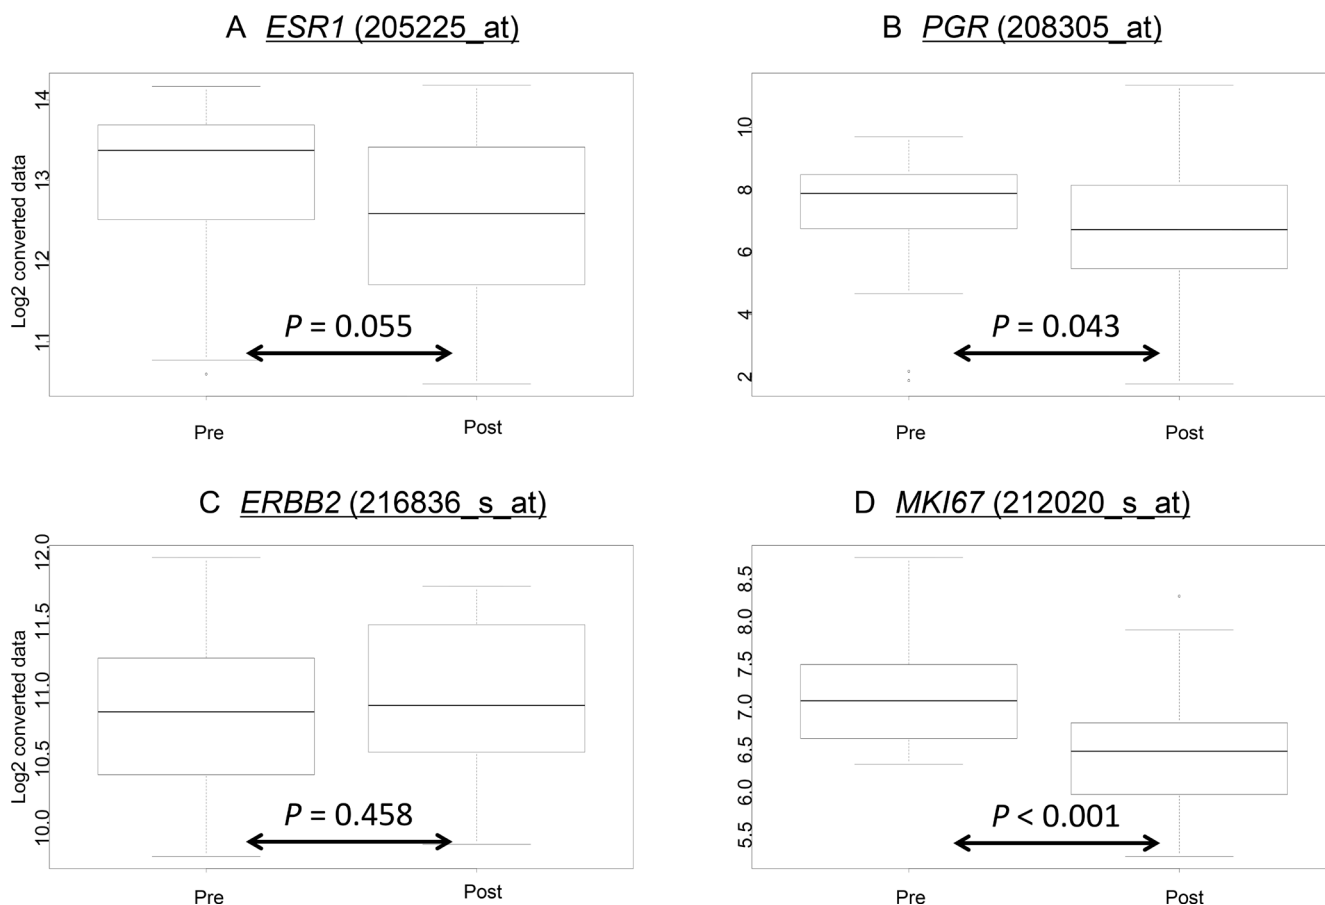

**Supplementary Figure 1: Gene expression before and after short-term hormone therapy.** P values were calculated by the Wilcoxon test.

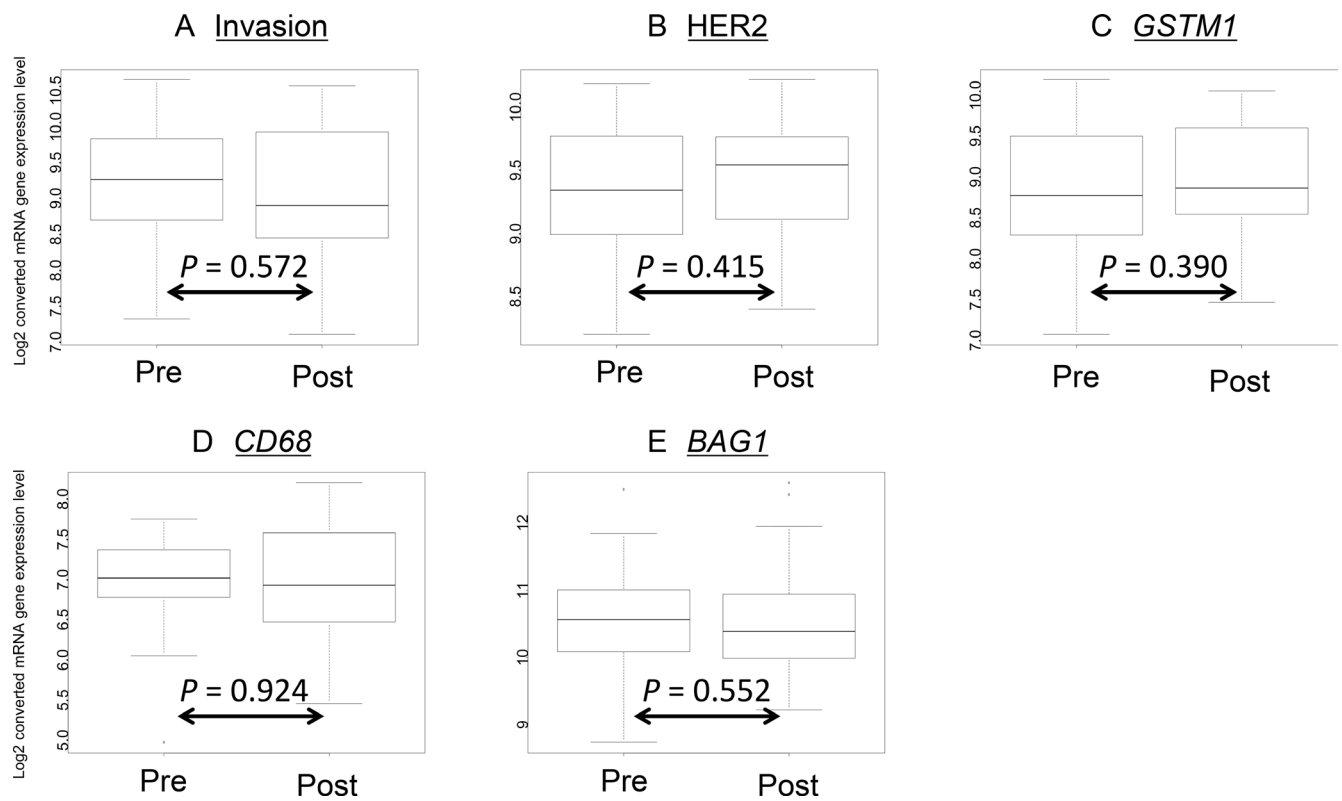

**Supplementary Figure 2: Gene expression before and after short-term hormone therapy.** (A) Invasion-associated (*MMP11* and *CTSL2*) and (B) HER2-associated (*GRB7* and *HER2*) genes refer to average expression values [12]. *P* values were calculated by the Wilcoxon test.
